# Supplementary material for: Thermodynamics of the Eu(iii)–Mg–SO4–H2O and Eu(iii)–Na–SO4–H2O systems. Part II: spectroscopy experiments, complexation and Pitzer/SIT models
Source: Royal Society of Chemistry journal article supplement (doi:10.1039/d3dt04323a), 2024-01-01
Supplement: d3dt04323a1.pdf [file d3dt04323a1.pdf]

Supporting Information

## Thermodynamics of the Eu(III)–Mg–SO<sub>4</sub>–H<sub>2</sub>O and Eu(III)–Na–SO<sub>4</sub>–H<sub>2</sub>O systems. Part II: spectroscopy experiments, complexation and Pitzer/SIT models

P. F. dos Santos<sup>1,\*</sup>, X. Gaona<sup>1,\*</sup>, A. Lassin<sup>2</sup>, A. Skerencak<sup>1</sup>, D. Fellhauer<sup>1</sup>, M. Altmaier<sup>1</sup> and B. Madé<sup>3</sup>

<sup>1</sup>Institute for Nuclear Waste Disposal, Karlsruhe Institute of Technology, Karlsruhe, Germany

<sup>2</sup>Water, Environment, Process Development and Analysis Division, BRGM, Orléans, France

<sup>3</sup>Research and Development Division, ANDRA, Châtenay-Malabry, France

corresponding author(s): [pedro.santos@kit.edu](mailto:pedro.santos@kit.edu); [xavier.gaona@kit.edu](mailto:xavier.gaona@kit.edu)

Table SI-1 summarizes all the results and experimental conditions of the systems investigated by TRLFS, including normalized intensities and pH measurements. The proton concentration, pH<sub>m</sub> were obtained from the measured values of pH<sub>exp</sub> considering pH<sub>m</sub> = pH<sub>exp</sub> + A<sub>m</sub>, where A<sub>m</sub> is a correction factor that involves the H<sup>+</sup> activity coefficient and the liquid junction potential of the electrode at a given concentration of background electrolyte. A<sub>m</sub> values for Na<sub>2</sub>SO<sub>4</sub> systems were used as reported in Duckworth et al<sup>1</sup> (work performed between 0.1–1.75 mol·Kg<sup>-1</sup> Na<sub>2</sub>SO<sub>4</sub>). All values pH<sub>m</sub> are close to 5, which supports the absence of any significant Eu(III) hydrolysis species or HSO<sub>4</sub><sup>-</sup> (< 1%).

**Table SI-1** – Measured and modelled normalized fluorescence intensity of Eu(III)–Na<sup>+</sup>–SO<sub>4</sub><sup>2-</sup> aqueous solutions at room temperature.

| [Na <sup>+</sup> ](mol·Kg <sup>-1</sup> ) | Log <sub>10</sub> [SO <sub>4</sub> <sup>2-</sup> ] | pH <sub>exp</sub> | pH <sub>m</sub> | I <sub>norm</sub> <sup>R,exp</sup> | I <sub>norm</sub> <sup>R,SIT</sup> | I <sub>norm</sub> <sup>R,Pitzer</sup> |
|-------------------------------------------|----------------------------------------------------|-------------------|-----------------|------------------------------------|------------------------------------|---------------------------------------|
| 0.00                                      | -5.49                                              | 5.7 ± 0.1         | -               | 1.00 ± 0.05                        | 1.08                               | 1.08                                  |
| 8.50E-04                                  | -3.07                                              | 5.8 ± 0.1         | -               | 1.46 ± 0.07                        | 1.27                               | 1.28                                  |
| 1.97E-03                                  | -2.70                                              | 5.6 ± 0.1         | -               | 1.65 ± 0.08                        | 1.41                               | 1.42                                  |
| 6.62E-03                                  | -2.18                                              | 5.5 ± 0.1         | -               | 1.74 ± 0.09                        | 1.68                               | 1.69                                  |
| 9.77E-03                                  | -2.01                                              | 5.6 ± 0.1         | -               | 1.72 ± 0.09                        | 1.76                               | 1.78                                  |
| 1.19E-02                                  | -1.93                                              | 5.6 ± 0.1         | -               | 1.82 ± 0.09                        | 1.80                               | 1.82                                  |
| 4.74E-02                                  | -1.32                                              | 5.7 ± 0.1         | -               | 2.02 ± 0.10                        | 2.05                               | 2.08                                  |
| 7.70E-02                                  | -1.11                                              | 5.6 ± 0.1         | -               | 2.11 ± 0.11                        | 2.14                               | 2.17                                  |
| 0.11                                      | -0.96                                              | 5.5 ± 0.1         | 5.1 ± 0.1       | 2.16 ± 0.11                        | 2.20                               | 2.23                                  |
| 0.16                                      | -0.81                                              | 5.6 ± 0.1         | 5.2 ± 0.1       | 2.33 ± 0.12                        | 2.29                               | 2.31                                  |
| 0.20                                      | -0.70                                              | 5.5 ± 0.1         | 5.1 ± 0.1       | 2.35 ± 0.12                        | 2.36                               | 2.38                                  |
| 0.26                                      | -0.59                                              | 5.5 ± 0.1         | 5.1 ± 0.1       | 2.43 ± 0.12                        | 2.43                               | 2.45                                  |
| 0.31                                      | -0.50                                              | 5.4 ± 0.1         | 5.0 ± 0.1       | 2.52 ± 0.13                        | 2.51                               | 2.52                                  |
| 0.36                                      | -0.45                                              | 5.4 ± 0.1         | 5.0 ± 0.1       | 2.58 ± 0.13                        | 2.56                               | 2.56                                  |
| 0.45                                      | -0.35                                              | 5.4 ± 0.1         | 5.0 ± 0.1       | 2.81 ± 0.14                        | 2.67                               | 2.66                                  |
| 0.51                                      | -0.29                                              | 5.5 ± 0.1         | 5.1 ± 0.1       | 2.83 ± 0.14                        | 2.73                               | 2.72                                  |
| 0.61                                      | -0.22                                              | 5.4 ± 0.1         | 5.0 ± 0.1       | 2.79 ± 0.14                        | 2.82                               | 2.81                                  |
| 0.70                                      | -0.15                                              | 5.4 ± 0.1         | 4.9 ± 0.1       | 2.89 ± 0.14                        | 2.90                               | 2.89                                  |
| 0.82                                      | -0.09                                              | 5.3 ± 0.1         | 4.8 ± 0.1       | 2.93 ± 0.15                        | 2.98                               | 2.97                                  |
| 0.90                                      | -0.05                                              | 5.3 ± 0.1         | 4.9 ± 0.1       | 2.98 ± 0.15                        | 3.04                               | 3.03                                  |
| 1.00                                      | 0.00                                               | 5.3 ± 0.1         | 4.9 ± 0.1       | 2.95 ± 0.15                        | 3.11                               | 3.10                                  |
| 1.20                                      | 0.08                                               | 5.4 ± 0.1         | 5.0 ± 0.1       | 3.11 ± 0.16                        | 3.22                               | 3.20                                  |
| 1.46                                      | 0.16                                               | 5.2 ± 0.1         | 4.9 ± 0.1       | 3.39 ± 0.17                        | 3.34                               | 3.32                                  |
| 1.55                                      | 0.19                                               | 5.2 ± 0.1         | 4.9 ± 0.1       | 3.36 ± 0.17                        | 3.38                               | 3.36                                  |
| 1.82                                      | 0.26                                               | 5.2 ± 0.1         | -               | 3.54 ± 0.18                        | 3.48                               | 3.44                                  |
| 2.03                                      | 0.31                                               | 5.1 ± 0.1         | -               | 3.64 ± 0.18                        | 3.54                               | 3.49                                  |

## Supporting Information

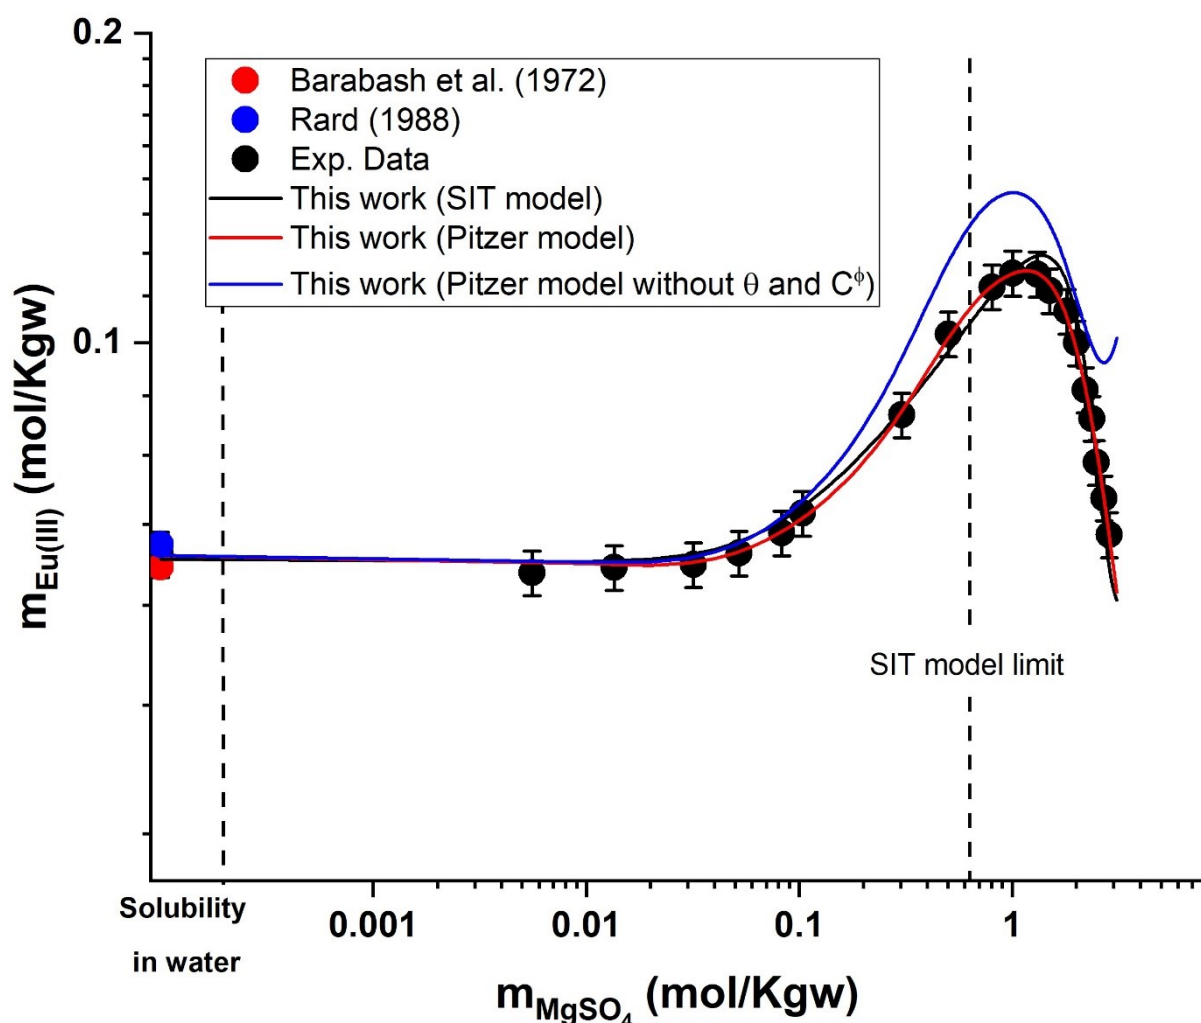

**Figure SI-1** – Solubility in the system  $\text{Eu}_2(\text{SO}_4)_3\text{-MgSO}_4\text{-H}_2\text{O}$  at room temperature in logarithmic scale, according to SIT (black line), Pitzer (red line) models. The blue line corresponds to the Pitzer excluding  $\theta_{\text{Mg}^{2+},\text{Eu}(\text{SO}_4)^+}$ ,  $C^{\phi}_{\text{Mg}^{2+},\text{Eu}(\text{SO}_4)_2^-}$  and  $C^{\phi}_{\text{Mg}^{2+},\text{Eu}(\text{SO}_4)_3^{3-}}$  as fitting parameters (see main text). Symbols: experimental data as reported in Part I of this work or in the literature<sup>2</sup>.

## REFERENCES

- 1 S. B. Duckworth, X. Gaona, A. Baumann, K. Dardenne, J. Rothe, D. Schild, M. Altmaier and H. Geckeis, *Radiochim. Acta*, 2021, **109**, 681–697.
- 2 P. F. dos Santos, A. Lassin, X. Gaona, K. Garbev, M. Altmaier and B. Madé, *Dalt. Trans.*
